# Supplementary material for: Genome-wide identification of gene expression in contrasting maize inbred lines under field drought conditions reveals the significance of transcription factors in drought tolerance
Source: PLoS One. 2017 Jul 12;12(7):e0179477. doi: 10.1371/journal.pone.0179477 (PMC5507481; doi:10.1371/journal.pone.0179477)
Supplement: S11 Table — (XLSX) [file pone.0179477.s014.xlsx]

## Sheet: Sheet1
S11 Table. Enrichment test of transcription factors in the H082183-specific responsive genes and genotypic DEGs under drought.
Type	H082183 specific response genes			Genotypic DEGs
	No. of genes	TFs in PlantTFDB	P value	No. of genes	TFs in PlantTFDB	P value
Transcription factors	20	3308	1.65e-05	22	3308	2.2e-16
Background gene set	555	38136		2821	38136
The background gene set was used to confirm whether the TFs are enriched or not. The 555 genes were H082183 specific response genes and the 2821 are genotypic DEGs under both moderate and severe drought.
